Retraction

## Retraction: Matrine alleviates lipopolysaccharide-induced intestinal inflammation and oxidative stress via CCR7 signal

Guojun Wu<sup>1,\*</sup>, Wenhong Zhou<sup>2,\*</sup>, Junfeng Zhao<sup>3</sup>, Xiaohua Pan<sup>1</sup>, Yongjie Sun<sup>1</sup>, Hao Xu<sup>1</sup>, Peng Shi<sup>1</sup>, Chong Geng<sup>1</sup>, Ling Gao<sup>4</sup> and Xingsong Tian<sup>1</sup>

<sup>1</sup>Department of Breast and Thyroid Surgery, Shandong Provincial Hospital Affiliated to Shandong University, Jinan 250021, Shandong, P. R. China

<sup>2</sup>Department of Nursing, Shandong Provincial Hospital Affiliated to Shandong University, Jinan 250021, Shandong, P. R. China

<sup>3</sup>Traffic Police Department, Jinan Public Security Bureau, Jinan 250021, Shandong, P. R. China

<sup>4</sup>Scientific Center, Shandong Provincial Hospital Affiliated to Shandong University, Jinan 250021, Shandong, P. R. China

\*These authors contributed equally to this work

**Published:** December 01, 2023

**Copyright:** © 2023 Wu et al. This is an open access article distributed under the terms of the [Creative Commons Attribution License](#) (CC BY 4.0), which permits unrestricted use, distribution, and reproduction in any medium, provided the original author and source are credited.

**This article has been retracted:** The authors have been unable to replicate their published results and are therefore no longer confident in the conclusions of their research. In light of this, and with the agreement of all authors, Oncotarget has decided to retract this paper.

Original article: Oncotarget. 2017; 8:11621–11628. <https://doi.org/10.18632/oncotarget.14598>
